# Supplementary material for: Nutritional and Functional Properties of Wild Food-Medicine Plants From the Coastal Region of South China
Source: PubMed Central journal article supplement — J Evid Based Integr Med. 2020 Apr 16;25:2515690X20913267. doi: 10.1177/2515690X20913267 (PMC7163236; doi:10.1177/2515690x20913267), 2020-04-16
Supplement: S_China_Food_Medicine_Plant-Supplementary_materials-revised.pdf [file S_China_Food_Medicine_Plant-Supplementary_materials-revised.pdf]

1 **Supplementary materials**

2

3 **Table S1.** Sources of samples and voucher information of taxa in the present study

| Taxa                                                | Locality                | Longitude and<br>Latitude        | Altitude<br>(m) | Voucher*                |
|-----------------------------------------------------|-------------------------|----------------------------------|-----------------|-------------------------|
| <i>Alternanthera sessilis</i> (L.)<br>R. Br. ex DC. | Chengmai,<br>Hainan     | 19°57'5.48"N;<br>110°5'28.71"E   | 25              | WFVR Exp.<br>16010185   |
| <i>Amaranthus blitum</i> L.                         | Zhangpu,<br>Fujian      | 23°55'54.12"N;<br>117°46'6.88"E  | 22              | WFVR Exp.<br>2016010084 |
| <i>A. spinosus</i> L.-1                             | Zhangpu,<br>Fujian      | 23°55'54.12"N;<br>117°46'6.88"E  | 22              | WFVR Exp.<br>2016010085 |
| <i>A. spinosus</i> L.-2                             | Chengmai,<br>Hainan     | 19°57'5.48"N;<br>110°5'28.71"E   | 25              | WFVR Exp.<br>16010190   |
| <i>A. spinosus</i> L.-3                             | Sanya,<br>Hainan        | 18°32'28.06"N;<br>109°44'52.27"E | 8               | WFVR Exp.<br>16010207   |
| <i>A. viridis</i> L.-1                              | Zhangpu,<br>Fujian      | 23°55'54.12"N;<br>117°46'6.88"E  | 22              | WFVR Exp.<br>2016010087 |
| <i>A. viridis</i> L.-2                              | Lufeng,<br>Guangdong    | 22°52'48.41"N;<br>116°8'11.00"E  | 3               | WFVR Exp.<br>2016010159 |
| <i>A. viridis</i> L.-3                              | Yangjiang,<br>Guangdong | 21°38'15.90"N;<br>111°57'7.62"E  | 6               | WFVR Exp.<br>16010239   |
| <i>Anredera cordifolia</i><br>(Tenore) Steenis      | Beihai,<br>Guangxi      | 21°03'24.17"N;<br>109°05'30.70"E | 13              | WFVR Exp.<br>16010233   |

|                                                        |                         |                                  |     |                         |
|--------------------------------------------------------|-------------------------|----------------------------------|-----|-------------------------|
| <i>Artemisia argyi</i> Lévl. et Van.                   | Zhanjiang,<br>Guangdong | 21°0'5.19"N;<br>110°26'37.15"E   | 15  | WFVR Exp.<br>16010225   |
| <i>Asystasia gangetica</i> (L.) T. Anderson            | Chengmai,<br>Hainan     | 19°57'5.48"N;<br>110°5'28.71"E   | 25  | WFVR Exp.<br>16010183   |
| <i>Celosia argentea</i> L.-1                           | Lufeng,<br>Guangdong    | 22°52'48.41"N;<br>116°8'11.00"E  | 3   | WFVR Exp.<br>2016010160 |
| <i>C. argentea</i> L.-2                                | Lufeng,<br>Guangdong    | 22°42'22.71"N;<br>115°26'11.48"E | 9   | WFVR Exp.<br>2016010164 |
| <i>C. argentea</i> L.-3                                | Lingao,<br>Hainan       | 19°55'51.61"N;<br>109°32'36.21"E | 10  | WFVR Exp.<br>16010194   |
| <i>C. argentea</i> L.-4                                | Sanya,<br>Hainan        | 18°19'46.65"N;<br>109°41'8.33"E  | 10  | WFVR Exp.<br>16010205   |
| <i>Cheilocostus speciosus</i> (J. Koenig) C. D. Specht | Lingao,<br>Hainan       | 19°42'3.61"N;<br>109°36'43.96"E  | 29  | WFVR Exp.<br>16010198   |
| <i>Commelina benghalensis</i> L.                       | Dongfang,<br>Hainan     | 21°1'57.21"N;<br>109°14'29.93"E  | 15  | WFVR Exp.<br>16010202   |
| <i>C. communis</i> L.                                  | Chao'an,<br>Guangdong   | 24°1'26.30"N;<br>116°53'6.83"E   | 139 | WFVR Exp.<br>2016010140 |
| <i>Eleutherococcus trifolius</i> (L.) S. Y. Hu         | Nan'ao,<br>Guangdong    | 23°28'59.23"N;<br>117°7'39.28"E  | 15  | WFVR Exp.<br>2016010149 |
| <i>Emilia sonchifolia</i> (L.) DC. ex DC.-1            | Chao'an,<br>Guangdong   | 24°1'26.30"N;<br>116°53'6.83"E   | 139 | WFVR Exp.<br>2016010142 |
| <i>E. sonchifolia</i> (L.) DC. ex DC.-2                | Qionghai,<br>Hainan     | 19°6'29.33"N;<br>110°34'10.89"E  | 12  | WFVR Exp.<br>16010216   |

|                                                                      |                       |                                  |     |                         |
|----------------------------------------------------------------------|-----------------------|----------------------------------|-----|-------------------------|
| <i>E. sonchifolia</i> (L.) DC. ex DC.-3                              | Beihai,<br>Guangxi    | 21°03'24.17"N;<br>109°05'30.70"E | 13  | WFVR Exp.<br>16010232   |
| <i>Eryngium foetidum</i> L.                                          | Wenchang,<br>Hainan   | 19°37'56.23"N;<br>110°47'19.44"E | 21  | WFVR Exp.<br>16010219   |
| <i>Gynura divaricata</i> (L.) DC.                                    | Wanning,<br>Hainan    | 18°39'46.94"N;<br>110°29'15.61"E | 24  | WFVR Exp.<br>16010213   |
| <i>Melastoma dodecandrum</i> Lour.                                   | Dapu,<br>Guangdong    | 24°39'10.24"N;<br>116°45'11.28"E | 676 | WFVR Exp.<br>2016010039 |
| <i>Pandanus tectorius</i>                                            | Lingshui,<br>Hainan   | 18°32'48.20"N;<br>110°6'57.34"E  | 13  | WFVR Exp.<br>16010211   |
| <i>Patrinia villosa</i> Juss.-1                                      | Wuhua,<br>Guangdong   | 23°49'9.85"N;<br>115°22'40.10"E  | 2   | WFVR Exp.<br>2016010004 |
| <i>P. villosa</i> Juss.-2                                            | Letu,<br>Fujian       | 24°54'20.97"N;<br>117°12'57.83"E | 258 | WFVR Exp.<br>2016010068 |
| <i>Perilla frutescens</i> var. <i>purpurascens</i> (Hayata) H. W. Li | Dapu,<br>Guangdong    | 24°39'10.24"N;<br>116°45'11.28"E | 676 | WFVR Exp.<br>2016010040 |
| <i>Plantago asiatica</i> L.                                          | Beihai,<br>Guangxi    | 21°03'24.17"N;<br>109°05'30.70"E | 13  | WFVR Exp.<br>16010234   |
| <i>Polygonum perfoliatum</i> L.                                      | Nanjing,<br>Fujian    | 24°54'20.97"N;<br>117°12'57.83"E | 258 | WFVR Exp.<br>2016010065 |
| <i>Portulaca oleracea</i> L.-1                                       | Huidong,<br>Guangdong | 22°43'28.46"N;<br>114°50'2.28"E  | 16  | WFVR Exp.<br>2016010174 |
| <i>P. oleracea</i> L.-2                                              | Sanya,<br>Hainan      | 18°19'46.65"N;<br>109°41'8.33"E  | 10  | WFVR Exp.<br>16010204   |

|                                                 |            |                |     |            |
|-------------------------------------------------|------------|----------------|-----|------------|
| <i>P. oleracea</i> L.-3                         | Beihai,    | 21°03'24.17"N; | 13  | WFVR Exp.  |
|                                                 | Guangxi    | 109°05'30.70"E |     | 16010230   |
| <i>Rosa laevigata</i> Michx.                    | Wuhua,     | 23°51'20.14"N; | 327 | WFVR Exp.  |
|                                                 | Guangdong  | 115°23'56.32"E |     | 2016010017 |
| <i>Smilax china</i> L.                          | Beihai,    | 21°3'26.32"N;  | 7   | WFVR Exp.  |
|                                                 | Guangxi    | 109°5'13.40"E  |     | 16010238   |
| <i>Solanum americanum</i><br>Mill.-1            | Dongshan,  | 23°39'28.19"N; | 15  | WFVR Exp.  |
|                                                 | Fujian     | 117°25'1.25"E  |     | 2016010088 |
| <i>S. americanum</i> Mill.-2                    | Lingshui,  | 18°32'48.20"N; | 13  | WFVR Exp.  |
|                                                 | Hainan     | 110°6'57.34"E  |     | 16010210   |
| <i>S. americanum</i> Mill.-3                    | Yangjiang, | 21°38'15.90"N; | 6   | WFVR Exp.  |
|                                                 | Guangdong  | 111°57'7.62"E  |     | 16010240   |
| <i>S. torvum</i> Swartz-1                       | Nan'ao,    | 23°28'59.23"N; | 15  | WFVR Exp.  |
|                                                 | Guangdong  | 117°7'39.28"E  |     | 2016010154 |
| <i>S. torvum</i> Swartz-2                       | Lufeng,    | 22°52'48.41"N; | 3   | WFVR Exp.  |
|                                                 | Guangdong  | 116°8'11.00"E  |     | 2016010163 |
| <i>S. torvum</i> Swartz-3                       | Huidong,   | 22°43'28.46"N; | 16  | WFVR Exp.  |
|                                                 | Guangdong  | 114°50'2.28"E  |     | 2016010172 |
| <i>Talinum paniculatum</i><br>(Jacq.) Gaertn.-1 | Chengmai,  | 19°57'5.48"N;  | 25  | WFVR Exp.  |
|                                                 | Hainan     | 110°5'28.71"E  |     | 16010186   |
| <i>T. paniculatum</i> (Jacq.)<br>Gaertn.-2      | Beihai,    | 21°03'24.17"N; | 13  | WFVR Exp.  |
|                                                 | Guangxi    | 109°05'30.70"E |     | 16010231   |

4 \*Voucher specimens store in IBSC (South China Botanical Garden). WFVR Exp. is an  
5 abbreviation of “Wild Fruit & Vegetable Resources Expedition”.

6 **Table S2.** Proximate composition of the edible parts (100 g, fresh weight) and Average Nutritive Value (ANV) of the studied species

| Taxa                               | Moisture (%)       | Proteins (g) | VC (mg) | Carotene (mg) | Fiber (g) | Fe (mg) | Ca (mg) | ANV   |
|------------------------------------|--------------------|--------------|---------|---------------|-----------|---------|---------|-------|
| <i>Alternanthera sessilis</i>      | 82.00 <sup>1</sup> | 3.27         | 5.81    | 14.86         | 9.42      | 17.23   | 440.74  | 38.10 |
| <i>Amaranthus blitum</i>           | 80.00 <sup>2</sup> | 5.82         | 11.30   | 31.93         | 10.61     | 10.55   | 305.48  | 52.32 |
| <i>A. spinosus</i>                 | 82.00 <sup>2</sup> | 3.51         | 2.52    | 56.32         | 8.91      | 9.25    | 483.23  | 75.45 |
| <i>A. viridis</i>                  | 80.00 <sup>2</sup> | 4.89         | 11.15   | 37.13         | 10.41     | 6.63    | 557.27  | 57.69 |
| <i>Anredera cordifolia</i>         | 93.60 <sup>3</sup> | 0.79         | 4.20    | 36.32         | 3.00      | 1.17    | 107.88  | 41.25 |
| <i>Artemisia argyi</i>             | 84.88 <sup>4</sup> | 3.32         | 1.86    | 48.99         | 7.23      | 3.24    | 243.23  | 60.99 |
| <i>Asystasia gangetica</i>         | 85.00 <sup>5</sup> | 3.18         | 4.41    | 74.10         | 7.19      | 6.54    | 363.13  | 88.93 |
| <i>Celosia argentea</i>            | 87.60 <sup>6</sup> | 2.49         | 3.69    | 28.72         | 5.81      | 7.08    | 323.71  | 41.90 |
| <i>Commelina benghalensis</i>      | 89.10 <sup>6</sup> | 1.84         | 7.90    | 36.56         | 3.70      | 6.44    | 175.74  | 45.80 |
| <i>C. communis</i>                 | 91.80 <sup>7</sup> | 1.03         | 1.42    | 6.61          | 5.28      | 8.62    | 73.13   | 17.18 |
| <i>Cheilocostus speciosus</i>      | 91.40 <sup>8</sup> | 0.91         | 3.86    | ND            | 3.29      | 1.31    | 179.57  | 6.02  |
| <i>Eleutherococcus trifoliatus</i> | 68.80 <sup>9</sup> | 6.45         | 25.86   | 41.81         | 17.77     | 3.62    | 111.36  | 64.43 |

|                                                       |                     |      |       |        |       |       |         |        |
|-------------------------------------------------------|---------------------|------|-------|--------|-------|-------|---------|--------|
| <i>Emilia sonchifolia</i>                             | 92.49 <sup>4</sup>  | 1.56 | 1.90  | 27.16  | 4.32  | 3.55  | 93.59   | 34.55  |
| <i>Eryngium foetidum</i>                              | 86.57 <sup>10</sup> | 1.89 | 11.55 | 26.34  | 5.58  | 7.16  | 47.83   | 36.64  |
| <i>Gynura divaricata</i>                              | 63.61 <sup>11</sup> | 6.99 | 4.00  | 114.08 | 21.54 | 4.95  | 491.33  | 144.51 |
| <i>Melastoma dodecandrum</i>                          | 87.18 <sup>12</sup> | 1.01 | 2.70  | 0.08   | 8.63  | 18.09 | 53.95   | 18.56  |
| <i>Pandanus tectorius</i>                             | 80.00 <sup>13</sup> | 1.75 | 0.44  | ND     | 7.05  | 2.35  | 1099.89 | 19.59  |
| <i>Patrinia villosa</i>                               | 81.90 <sup>14</sup> | 2.40 | 11.17 | 69.69  | 10.94 | 3.13  | 81.18   | 83.76  |
| <i>Perilla frutescens</i> var.<br><i>purpurascens</i> | 82.34 <sup>15</sup> | 2.32 | 4.15  | 40.42  | 12.65 | 24.73 | 151.75  | 67.53  |
| <i>Plantago asiatica</i>                              | 84.70 <sup>16</sup> | 2.70 | 9.36  | 35.80  | 6.98  | 6.30  | 600.49  | 52.72  |
| <i>Polygonum perfoliatum</i>                          | 85.23 <sup>17</sup> | 1.80 | 1.63  | 10.85  | 10.84 | 1.47  | 603.23  | 28.86  |
| <i>Portulaca oleracea</i>                             | 93.00 <sup>5</sup>  | 1.16 | 2.50  | 14.98  | 3.07  | 8.09  | 122.49  | 23.61  |
| <i>Rosa laevigata</i>                                 | 46.28 <sup>18</sup> | 3.86 | 68.32 | 3.35   | 31.87 | 1.78  | 236.07  | 40.95  |
| <i>Solanum americanum</i>                             | 70.48 <sup>19</sup> | 7.90 | 13.51 | 166.32 | 14.47 | 11.65 | 513.53  | 193.67 |
| <i>S. torvum</i>                                      | 79.89 <sup>20</sup> | 3.31 | 18.55 | 2.71   | 11.13 | 1.38  | 58.10   | 16.25  |
| <i>Talinum paniculatum</i>                            | 91.50 <sup>21</sup> | 1.78 | 2.76  | 23.86  | 3.33  | 3.51  | 82.71   | 30.20  |

7 ND: Not Detected.

8

9 **References**

10

- 11 1. Sheela K, Nath KG, Vijayalakshmi D, Yankanchi GM, Patil RB. Proximate composition of underutilized green leafy vegetables in Southern  
12 Karnataka. *J Hum Ecol.* 2004;15(3):227-229.
- 13 2. Jimenez-Aguilar DM, Grusak MA. Minerals, vitamin C, phenolics, flavonoids and antioxidant activity of *Amaranthus* leafy vegetables. *J Food*  
14 *Compos Anal.* 2017;58:33-39.
- 15 3. Liang Y, Chen JL, Wu SY, Chen YZ. The test of *Anredera cordifolia* on nutrient quality and acute toxicity. *Clin Med Eng.* 2010;1:57-58.
- 16 4. Huang LH, Li YY. Analysis on contents nutrition in *Artemisia argyi*. *Food Res Dev.* 2014;35(20):124-127.
- 17 5. Odhav B, Beekrum S, Akula U, Baijnath H. Preliminary assessment of nutritional value of traditional leafy vegetables in KwaZulu-Natal, South  
18 Africa. *J Food Compos Anal.* 2007;20(5):430-435.
- 19 6. Gupta S, Lakshmi AJ, Manjunath M, Prakash J. Analysis of nutrient and antinutrient content of underutilized green leafy vegetables. *LWT-Food*  
20 *Sci Technol.* 2005;38(4):339-345.

- 21 7. Ogle BM, Johansson M, Tuyet HT, Johannesson L. Evaluation of the significance of dietary folate from wild vegetables in Vietnam. *Asia Pac*  
22 *J Clin Nutr.* 2001;10(3):216-221.
- 23 8. Zhao TR, Fan J, Li YS, Qin YY. Nutritional components of wild *Costus speciosus* (Koenig) Smith of Yunnan Province. *J Southwest Agric Univ*  
24 *(Nat Sci).* 2004;26(4):456-458.
- 25 9. Li WF, Yan L, Xiang N. Chemical composition and quality evaluation of leaves of *Acanthopanax trifoliatum* (L.) Merr. *Nat Prod Res Dev.*  
26 2013;25:1077-1080.
- 27 10. Singh S, Singh D, Salim K, Srivastava A, Singh L, Srivastava R. Estimation of proximate composition, micronutrients and phytochemical  
28 compounds in traditional vegetables from Andaman and Nicobar Islands. *Int J Food Sci Nutr.* 2011;62(7):765-773.
- 29 11. Jaiboon V, Boonyanuphap J, Suwansri S, Ratanatraiwong P, Hansawasdi C. Alpha amylase inhibition and roasting time of local vegetables and  
30 herbs prepared for diabetes risk reduction chili paste. *Asian J Food Ag-Ind.* 2010;3(1):1-12.
- 31 12. Shi D, Liu J, Chen B. An analysis of nutrient constituents of *Melastoma dodecandrum* Lour fruit. *J Fujian Normal Univ (Nat Sci).*  
32 2000;16(3):69-71.
- 33 13. Adkar PP, Bhaskar V. *Pandanus odoratissimus* (Kewda): A review on ethnopharmacology, phytochemistry, and nutritional aspects [published  
34 online December 22, 2014]. *Adv Pharmacol Sci.* doi: 10.1155/2014/120895



- 35 14. Zhu J, Li Z, Chen J. Determination of volatile compounds and nutrients analysis of wild *Patrinia villosa*. *Trans Chinese Soc Agric Eng.*  
36 2002;18(5): 193-197.
- 37 15. Zhang ZJ. Analysis of the main nutrition ingredients of edible leaf red *Perilla* in different growth stages. *Food Nut China.* 2014;20(4):69-72.
- 38 16. Zhao YY, Zhang KW, Dai YQ, Guo XX, Yin JH. Analysis of nutrient components and determination of nitrite content in four kinds of potherb  
39 in Yongzhou. *Chinese Agric Sci Bull.* 2008;24(10):115-117.
- 40 17. Narzary H, Swargiary A, Basumatary S. Proximate and vitamin C analysis of wild edible plants consumed by Bodos of Assam, India. *J Mol*  
41 *Pathophysiol.* 2015;4(4):128-133.
- 42 18. He YH. Progress in researches of biological functions of *Rosa Laevigata* Michx and health food made from it. *The Bev Ind.* 2001;4(3):33-35.
- 43 19. Ding LJ, Chen X, Ma QQ. Analysis on nutritional compounds and tannin in wild vegetables of Chaozhou. *Academic Period Farm Prod Proc.*  
44 2005;12:71-72.
- 45 20. Andarwulan N, Kurniasih D, Apriady RA, Rahmat H, Roto AV, Bolling BW. Polyphenols, carotenoids, and ascorbic acid in underutilized  
46 medicinal vegetables. *J Funct Foods.* 2012;4(1):339-347.
- 47 21. Yang X, Guo JX. Assessment study on nutritive compositions and value of main wild vegetables in south China. *Food Sci.* 2002;23(11):121-  
48 125.
- 49
